# Supplementary material for: MYC overexpression leads to increased chromatin interactions at super-enhancers and MYC binding sites
Source: HighWire-hosted journal article supplement (doi:10.1101/gr.276313.121), 2022-02-03
Supplement: Supplemental_Materials.pdf [file Supplemental_Materials.pdf]

# ***MYC* overexpression leads to increased chromatin interactions at superenhancers and MYC binding sites**

Yi Xiang See<sup>1,2</sup>, Kaijing Chen<sup>1,2</sup>, Melissa J. Fullwood<sup>1,2,3,\*</sup>

<sup>1</sup>School of Biological Sciences, Nanyang Technological University, Singapore.

<sup>2</sup>Cancer Science Institute of Singapore, National University of Singapore.

<sup>3</sup>Institute of Molecular and Cell Biology, Agency for Science, Technology and Research (A\*STAR), Singapore.

\* Corresponding author ([mfullwood@ntu.edu.sg](mailto:mfullwood@ntu.edu.sg))

## **Contents**

1. Supplementary Tables
2. Supplementary Figures

## Supplemental Tables

**Supplemental Table S1 | SIQHiC sequencing statistics for Low *MYC* and High *MYC* cells.**

|                                                 | Low <i>MYC</i> R1    | Low <i>MYC</i> R2    | High <i>MYC</i> R1   | High <i>MYC</i> R2   |
|-------------------------------------------------|----------------------|----------------------|----------------------|----------------------|
| Total Reads                                     | 466,371,873          | 473,073,105          | 489,552,289          | 466,324,553          |
| Total Mapped Reads<br>(Human hg19 ONLY)         | 449,798,985<br>96.4% | 457,408,641<br>96.7% | 483,099,602<br>98.7% | 456,793,366<br>98.0% |
| Total Mapped Reads<br>(Human hg19 + Mouse mm10) | 463,092,913<br>99.3% | 469,974,590<br>99.3% | 486,308,738<br>99.3% | 462,613,290<br>99.2% |
| Discarded Reads                                 | 1,097,259<br>0.2%    | 1,085,736<br>0.2%    | 826,538<br>0.2%      | 927,729<br>0.2%      |
| Human-Human Paired Reads                        | 448,297,483<br>96.1% | 455,970,215<br>96.4% | 482,156,004<br>98.5% | 455,706,205<br>97.7% |
| Mouse-Mouse Paired Reads                        | 13,698,171<br>2.9%   | 12,918,639<br>2.7%   | 3,326,196<br>0.7%    | 5,979,356<br>1.3%    |
| Human-Human Paired Reads                        | 448,297,483          | 455,970,215          | 482,156,004          | 455,706,205          |
| Human Unique Reads                              | 310,510,965<br>69.3% | 322,597,046<br>70.7% | 302,156,580<br>62.7% | 328,864,586<br>72.2% |
| Intra-Fragment Reads                            | 721,931              | 383,939              | 1,659,119            | 455,654              |
| Below MAPQ30 Threshold                          | 43,677,206           | 47,649,671           | 39,799,686           | 47,840,823           |
| Hi-C Contacts                                   | 266,111,828<br>85.7% | 274,563,436<br>85.1% | 260,697,775<br>86.3% | 280,568,109<br>85.3% |
| Inter-chromosomal                               | 22,188,336           | 29,460,191           | 11,484,151           | 25,330,251           |
| Intra-chromosomal                               | 243,923,492<br>91.7% | 245,103,245<br>89.3% | 249,213,624<br>95.6% | 255,237,858<br>91.0% |
| Short (<20kb)                                   | 131,525,754          | 106,418,212          | 183,310,972          | 113,572,967          |
| Long (>20kb)                                    | 112,397,575          | 138,684,836          | 65,902,548           | 141,664,640          |
| Mouse-Mouse Paired Reads                        | 13,698,171           | 12,918,639           | 3,326,196            | 5,979,356            |
| Mouse Unique Reads                              | 9,591,745<br>70.0%   | 9,195,144<br>71.2%   | 2,137,464<br>64.3%   | 4,361,700<br>72.9%   |
| Intra-Fragment Reads                            | 34,711               | 16,340               | 20,531               | 9,946                |
| Below MAPQ30 Threshold                          | 1,584,670            | 1,644,047            | 342,276              | 757,343              |
| Hi-C Contacts                                   | 7,972,364<br>83.1%   | 7,534,757<br>81.9%   | 1,774,657<br>83.0%   | 3,594,411<br>82.4%   |
| Inter-chromosomal                               | 841,107              | 819,222              | 143,395              | 380,435              |
| Intra-chromosomal                               | 7,131,257<br>89.4%   | 6,715,535<br>89.1%   | 1,631,262<br>91.9%   | 3,213,976<br>89.4%   |
| Short (<20kb)                                   | 3,898,627            | 3,186,260            | 1,153,069            | 1,574,659            |
| Long (>20kb)                                    | 3,232,626            | 3,529,269            | 478,192              | 1,639,311            |

Supplemental Table S2 | Calculation of Low *MYC* and High *MYC* SIQHiC Ratio.

|                                | Total reads | Human Contacts | Mouse Contacts | Human Contacts /<br>Mouse Contacts<br>(HMR) | HMR Fold Change<br>vs. Low <i>MYC</i> | SIQHiC Ratio |       |
|--------------------------------|-------------|----------------|----------------|---------------------------------------------|---------------------------------------|--------------|-------|
| Low <i>MYC</i><br>Replicate 1  | 466,371,873 | 266,111,828    | 7,972,364      | 33.379                                      | 1.000                                 | 0.227        | 0.346 |
| Low <i>MYC</i><br>Replicate 2  | 473,073,105 | 274,563,436    | 7,534,757      | 36.440                                      | 1.000                                 | 0.467        |       |
| High <i>MYC</i><br>Replicate 1 | 489,552,289 | 260,697,775    | 1,774,657      | 146.900                                     | 4.401                                 | 1.000        | 1.000 |
| High <i>MYC</i><br>Replicate 2 | 466,324,553 | 280,568,109    | 3,594,411      | 78.057                                      | 2.142                                 | 1.000        |       |

**Supplemental Table S3 | SIQHiC sequencing statistics for siControl and siCTCF cells.**

|                                                 | siControl_R1 | siControl_R2 | siCTCF_R1   | siCTCF_R2   |
|-------------------------------------------------|--------------|--------------|-------------|-------------|
| Total Reads                                     | 486,430,445  | 471,799,212  | 494,076,632 | 464,953,616 |
| Total Mapped Reads<br>(Human hg19 ONLY)         | 478,571,646  | 465,466,367  | 478,635,584 | 452,965,855 |
|                                                 | 98.4%        | 98.7%        | 96.9%       | 97.4%       |
| Total Mapped Reads<br>(Human hg19 + Mouse mm10) | 484,412,681  | 469,633,466  | 492,190,679 | 463,577,777 |
|                                                 | 99.6%        | 99.5%        | 99.6%       | 99.7%       |
| Discarded Reads                                 | 8,946,230    | 8,676,392    | 9,467,542   | 8,385,251   |
|                                                 | 1.8%         | 1.8%         | 1.9%        | 1.8%        |
| Human-Human Paired Reads                        | 456,579,962  | 446,730,331  | 444,058,460 | 421,007,523 |
|                                                 | 94.3%        | 95.1%        | 90.2%       | 90.8%       |
| Mouse-Mouse Paired Reads                        | 18,886,489   | 14,226,743   | 38,664,677  | 34,185,003  |
|                                                 | 3.9%         | 3.0%         | 7.9%        | 7.4%        |
| Human-Human Paired Reads                        | 456,579,962  | 446,730,331  | 444,058,460 | 421,007,523 |
| Human Unique Reads                              | 350,524,868  | 349,173,808  | 339,280,375 | 324,857,931 |
|                                                 | 76.8%        | 78.2%        | 76.4%       | 77.2%       |
| Intra-Fragment Reads                            | 1,432,009    | 1,406,054    | 791,344     | 867,189     |
| Below MAPQ30 Threshold                          | 48,226,797   | 47,048,482   | 50,259,186  | 47,455,721  |
| Hi-C Contacts                                   | 300,866,062  | 300,719,272  | 288,229,845 | 276,535,021 |
|                                                 | 85.8%        | 86.1%        | 85.0%       | 85.1%       |
| Inter-chromosomal                               | 20,419,370   | 20,936,012   | 24,006,698  | 22,347,537  |
| Intra-chromosomal                               | 280,446,692  | 279,783,260  | 264,223,147 | 254,187,484 |
|                                                 | 93.2%        | 93.0%        | 91.7%       | 91.9%       |
| Short (<20kb)                                   | 174,860,580  | 172,296,248  | 132,033,769 | 127,643,655 |
| Long (>20kb)                                    | 105,584,341  | 107,485,122  | 132,188,499 | 126,543,115 |
| Mouse-Mouse Paired Reads                        | 18,886,489   | 14,226,743   | 38,664,677  | 34,185,003  |
| Mouse Unique Reads                              | 14,686,344   | 11,244,958   | 29,608,422  | 26,428,013  |
|                                                 | 77.8%        | 79.0%        | 76.6%       | 77.3%       |
| Intra-Fragment Reads                            | 77,091       | 59,623       | 84,404      | 89,673      |
| Below MAPQ30 Threshold                          | 2,291,250    | 1,723,683    | 5,061,344   | 4,473,166   |
| Hi-C Contacts                                   | 12,318,003   | 9,461,652    | 24,462,674  | 21,865,174  |
|                                                 | 83.9%        | 84.1%        | 82.6%       | 82.7%       |
| Inter-chromosomal                               | 792,851      | 629,814      | 1,868,727   | 1,664,169   |
| Intra-chromosomal                               | 11,525,152   | 8,831,838    | 22,593,947  | 20,201,005  |
|                                                 | 93.6%        | 93.3%        | 92.4%       | 92.4%       |
| Short (<20kb)                                   | 7,247,274    | 5,494,816    | 11,458,406  | 10,285,651  |
| Long (>20kb)                                    | 4,277,798    | 3,336,949    | 11,135,460  | 10,285,651  |

Supplemental Table S4 | Calculation of siControl and siCTCF SIQHIC Ratio.

|                          | Total reads | Human Contacts | Mouse Contacts | Human Contacts /<br>Mouse Contacts | HMR Fold Change<br>vs. siCTCF | SIQHIC Ratio |       |
|--------------------------|-------------|----------------|----------------|------------------------------------|-------------------------------|--------------|-------|
| siControl<br>Replicate 1 | 486,430,444 | 300,866,062    | 12,318,003     | 24.425                             | 2.073                         | 1.000        | 1.000 |
| siControl<br>Replicate 2 | 471,799,212 | 300,719,272    | 9,461,652      | 31.783                             | 2.513                         | 1.000        |       |
| siCTCF<br>Replicate 1    | 494,076,632 | 288,229,845    | 24,462,674     | 11.782                             | 1.000                         | 0.482        | 0.441 |
| siCTCF<br>Replicate 2    | 464,953,616 | 276,535,021    | 21,865,174     | 12.647                             | 1.000                         | 0.398        |       |

**Supplemental Table S5 | RT-qPCR and 4C primer sequences.**

| RT-qPCR Primers | Sequence               |
|-----------------|------------------------|
| <i>TBP</i> _F   | TAATCCCAAGCGATTTGCTG   |
| <i>TBP</i> _R   | CAGTTGTCCGTGGCTCTCTT   |
| <i>MYC</i> _F   | CACCAGCAGCGACTCTGA     |
| <i>MYC</i> _R   | GATCCAGACTCTGACCTTTTGC |
| <i>CTCF</i> _F  | CAAACACACCCACGAGAA     |
| <i>CTCF</i> _R  | CTCCAGTATGAGAGCGAATG   |

| 4C Viewpoint | 4C Primer | Sequence                                           |
|--------------|-----------|----------------------------------------------------|
|              | Outer F   | TTAGCCACGAAGTGCCTGC                                |
|              | Outer R   | AGGAGAACTGTTTTTCATTGCCATG                          |
|              | Nested F  | AATGATACGGCGACCACCGAGATCTACACXXXXXXXXTCG           |
|              |           | TCGGCAGCGTCAGATGTGTATAAGAGACAGGGTGGAGTT            |
|              | Nested R  | CAAGCAGAAGACGGCATACGAGATYYYYYYYGTCTCGTG            |
| Chr2_PROC_SE |           | GGCTCGGAGATGTGTATAAGAGACAGTGATTGGATGCAG<br>CACTTGG |

\*XXXXXXXX: Substitute with appropriate Illumina Nextera i5 index sequence

\*YYYYYYY: Substitute with appropriate Illumina Nextera i7 index sequence

## Supplemental Figures

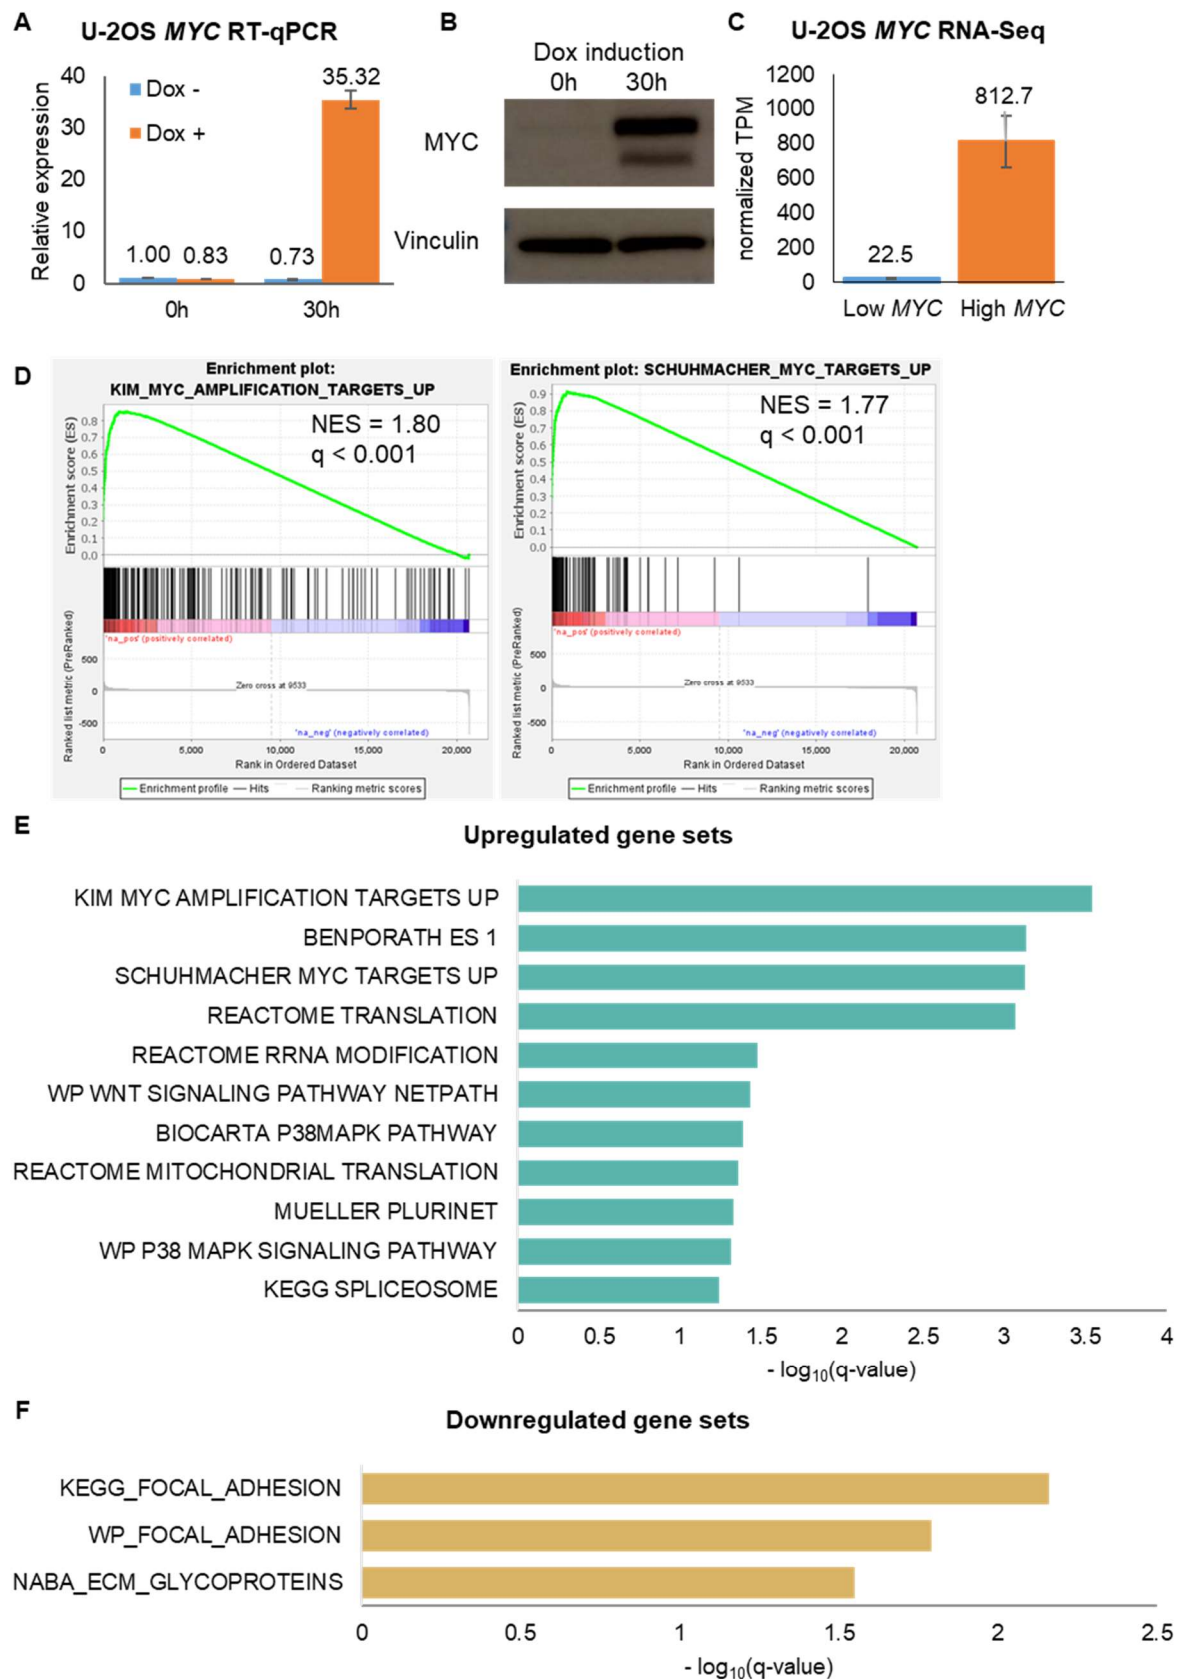

**Supplemental Figure S1 | *MYC* expression and regulated genes.** (A) *MYC* gene expression in U2OS cells before and after doxycycline (Dox) induction, normalized against *TBP* gene. Error bars show standard error across 3 biological replicates. (B) Western blot showing MYC protein expression with and without doxycycline (Dox) induction. Vinculin is shown as a loading control. (C) RNA-Seq normalized transcripts per million (TPM) expression of *MYC* in U2OS Low *MYC* and High *MYC* cells. (D) Gene set enrichment analysis (GSEA) plots of 2 previously published MYC regulated gene sets. (E) Top upregulated gene sets after *MYC* overexpression. (F) Top downregulated gene sets after *MYC* overexpression.



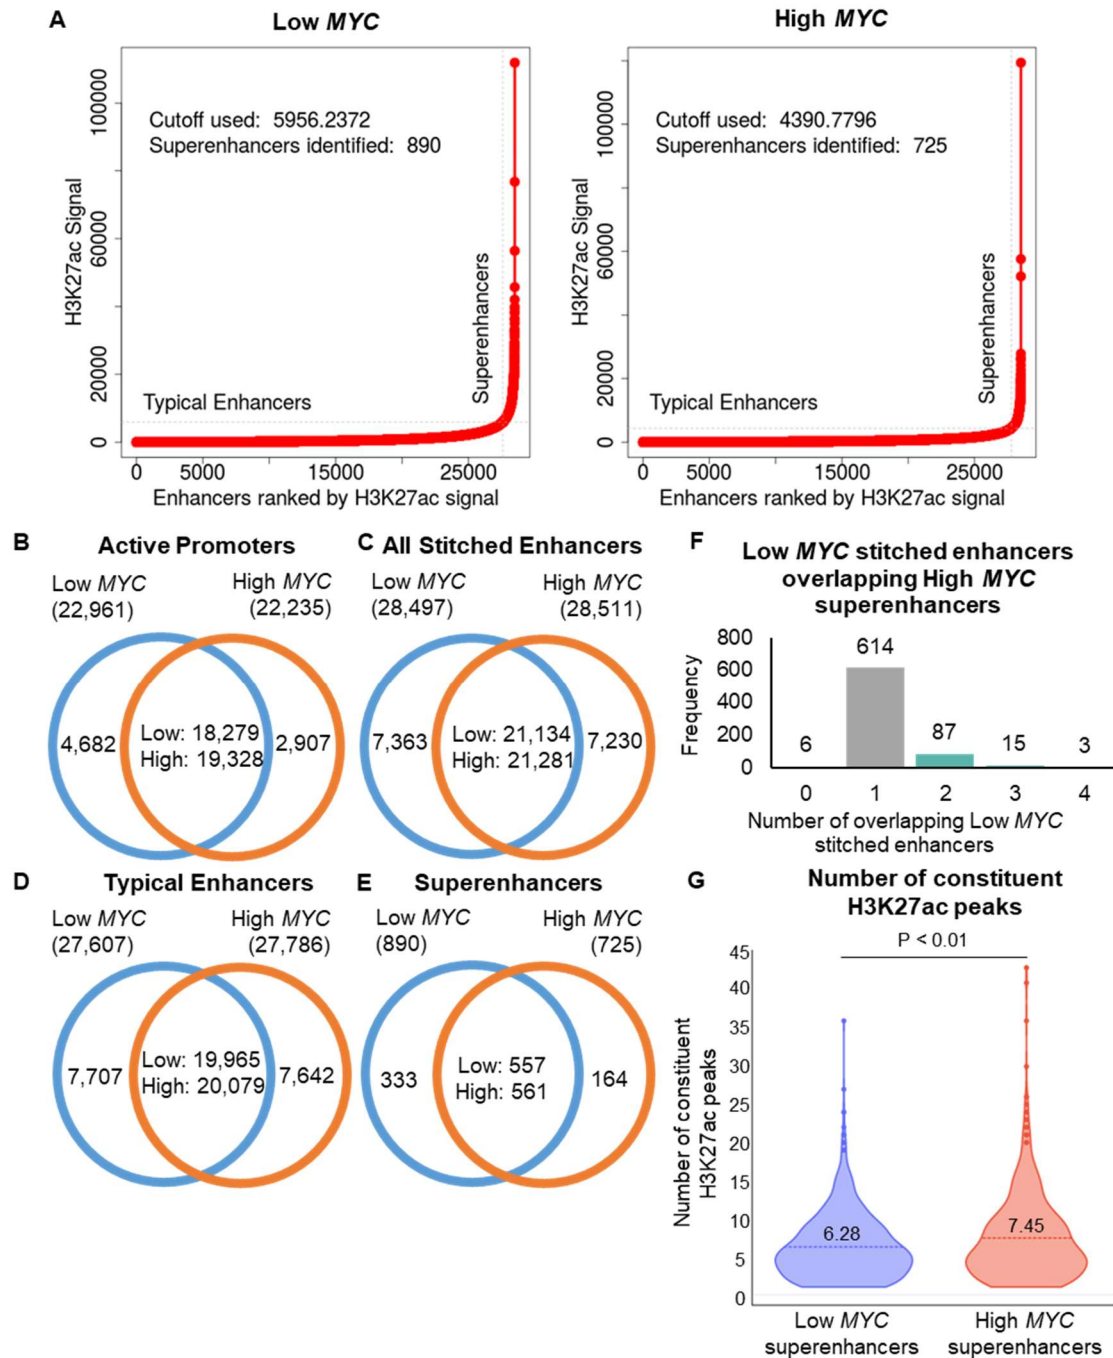

**Supplemental Figure S2 | Enhancer and superenhancers.** (A) Identification of Low *MYC* (left) and High *MYC* (right) superenhancers by ranking stitched enhancers based on H3K27ac (see Methods). (B-E) Overlap of (B) active promoter peaks, (C) all stitched enhancers, (D) typical enhancers and (E) superenhancers between Low *MYC* and High *MYC* cells. (F) Number of Low *MYC* stitched enhancers overlapping High *MYC* superenhancers. (G) Violin plot showing number of constituent H3K27ac

peaks merged with Low MYC and High MYC superenhancers. P values were calculated using two-tailed t-test assuming unequal variances.

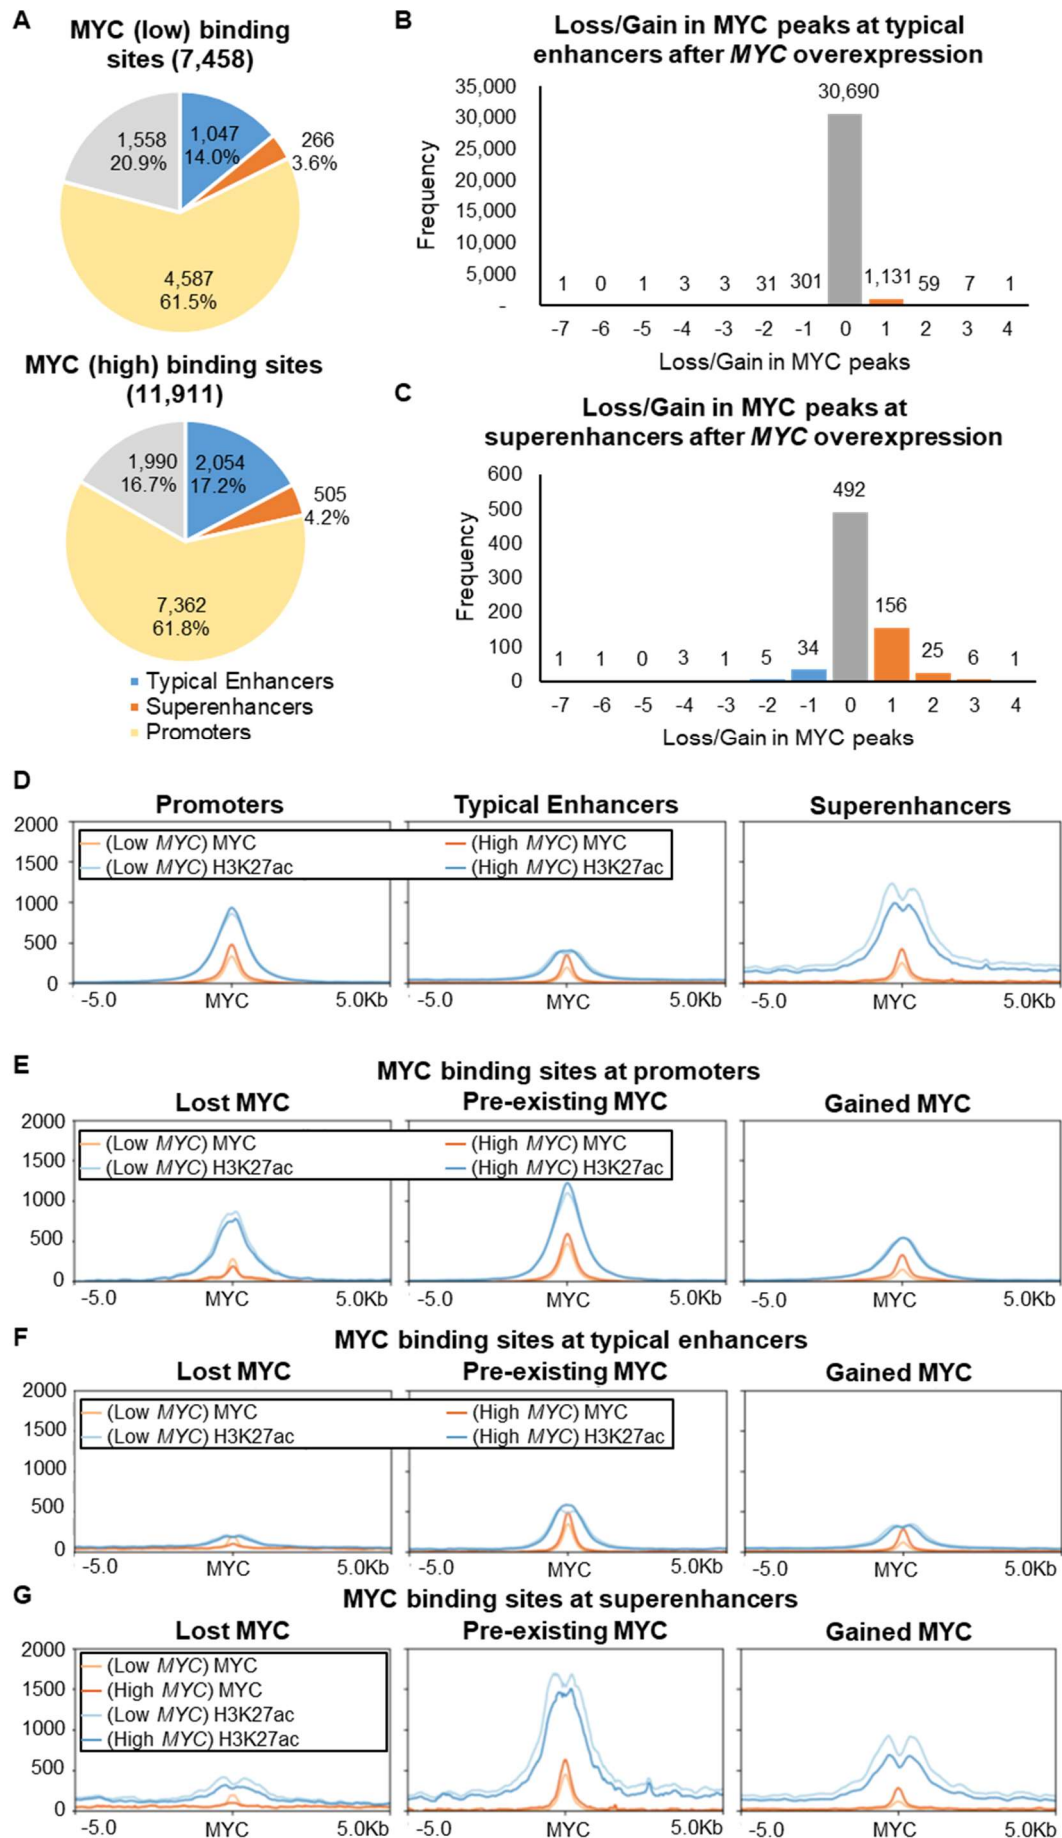

**Supplemental Figure S3 | MYC binding sites at promoters and enhancers.** (A) Distribution of MYC binding sites at cis-regulatory elements in Low *MYC* (left) and High *MYC* (right) cells. (B-C) Gain and loss of MYC peaks at (B) typical enhancers and (C) superenhancers after *MYC* overexpression. (D) H3K27ac and MYC ChIP-seq signal at MYC binding sites on promoters, typical enhancers and superenhancers. (E-G) H3K27ac and MYC ChIP-seq signal at lost, pre-existing and gained MYC binding sites on (E) typical enhancers, (F) superenhancers and (G) promoters.

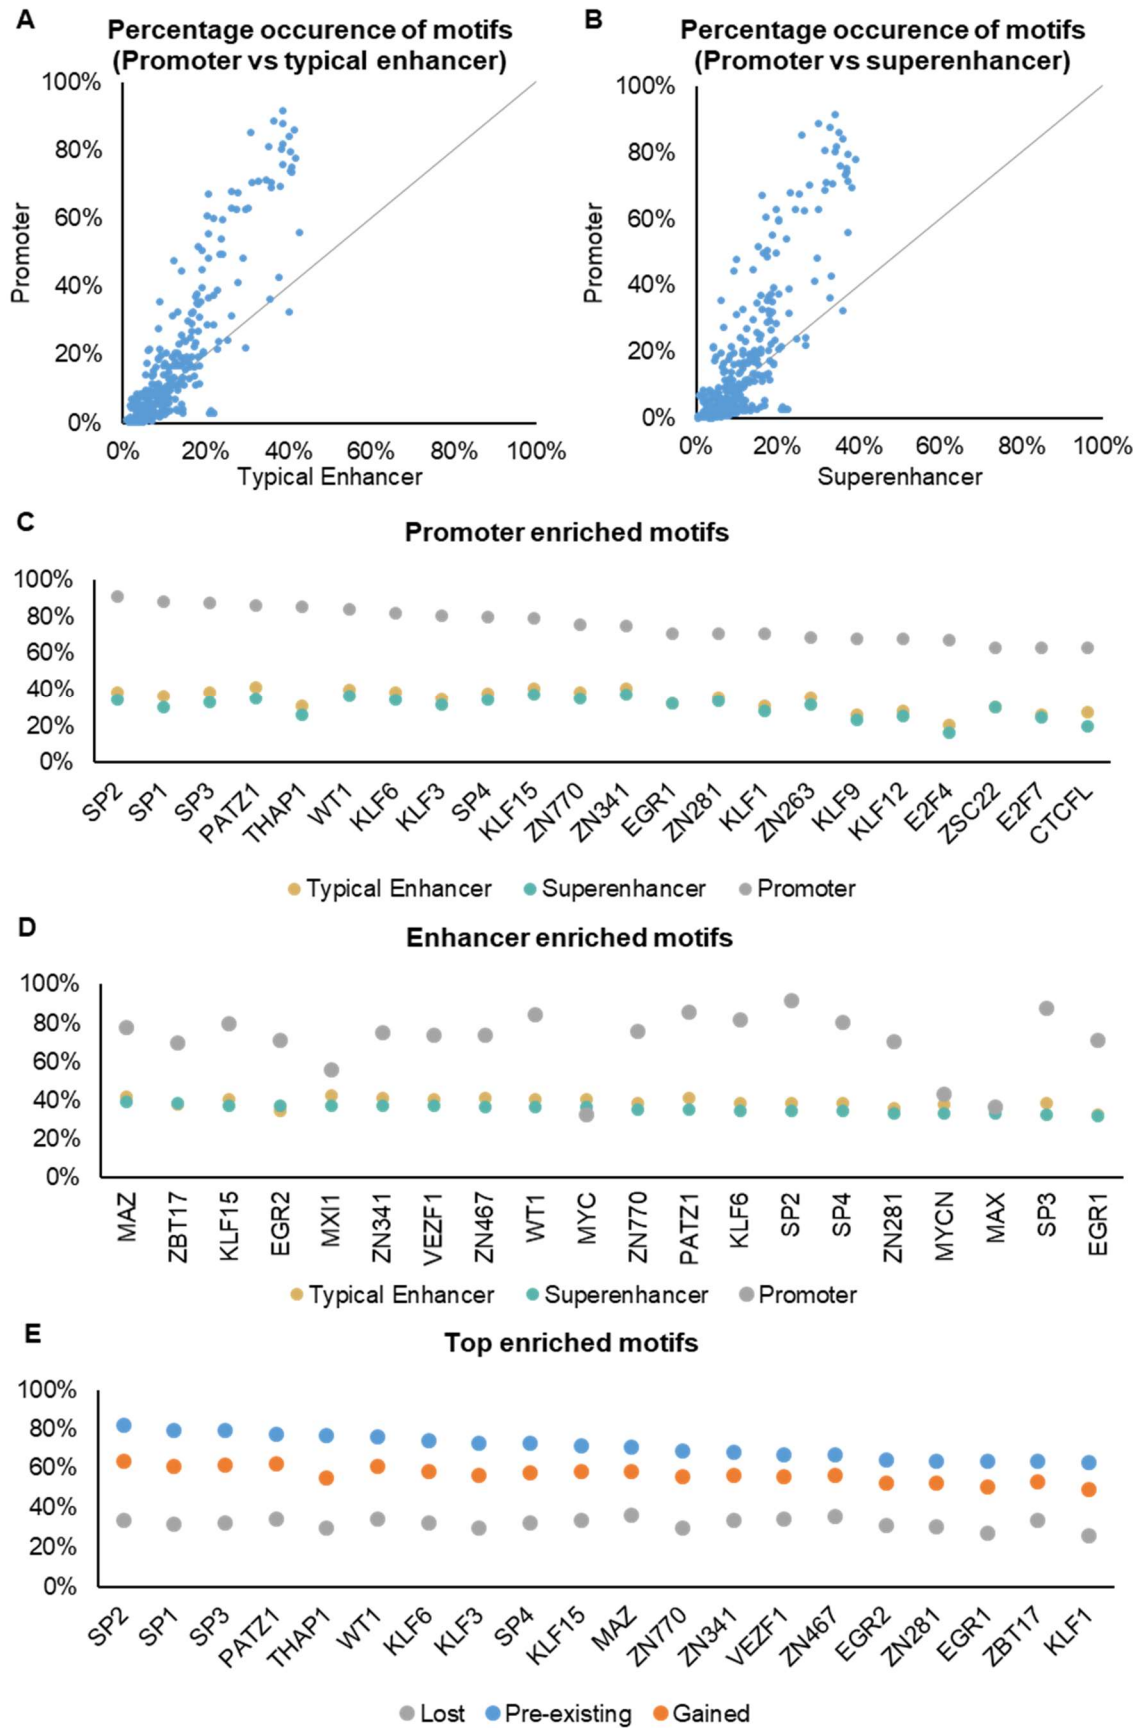

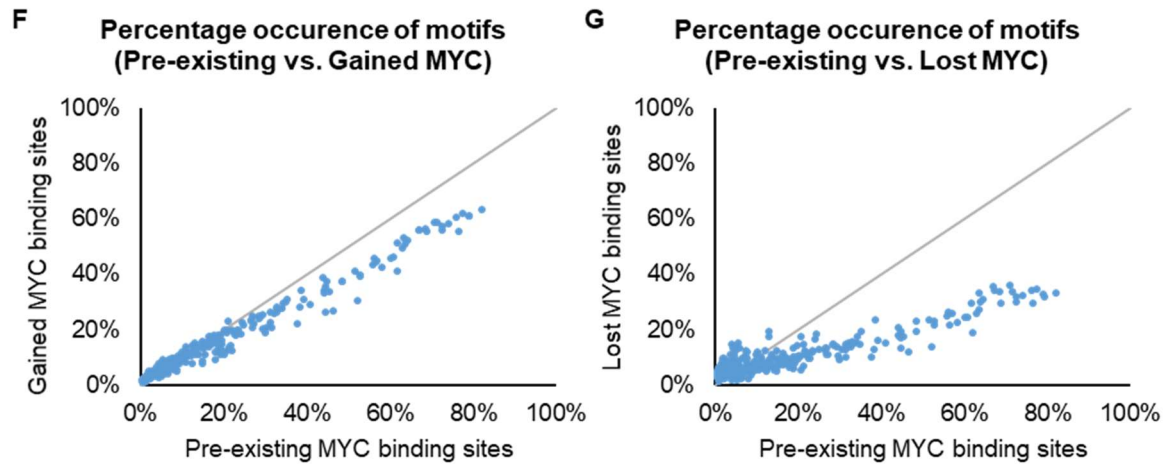

**Supplemental Figure S4 | Motif occurrence at MYC binding sites.** (A-B) Percentage occurrence of HOCOMOCO transcription factor motifs at promoter MYC binding sites versus (A) typical enhancer and (B) superenhancer MYC binding sites. Each point represents 1 motif. The grey line shows equal percentage occurrence. (C-D) Top enriched HOCOMOCO transcription factor motifs occurring at (C) promoter and (D) enhancer MYC binding sites. (E) Top enriched motifs at lost, pre-existing and gained MYC binding sites. (F-G) Percentage occurrence of HOCOMOCO transcription factor motifs at (F) gained and (G) lost MYC binding sites versus pre-existing MYC binding sites. Each point represents 1 motif. The grey line shows equal percentage occurrence.



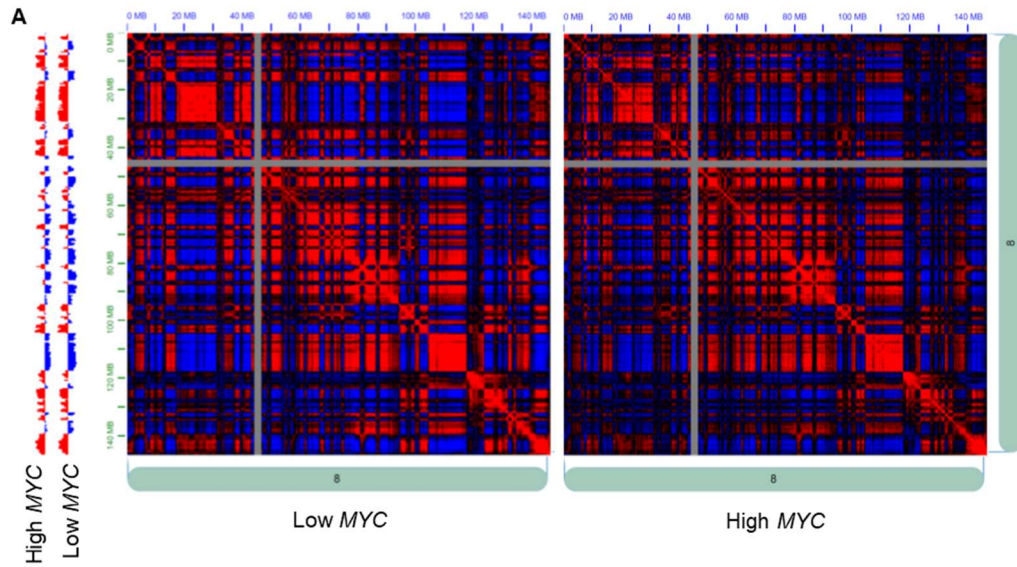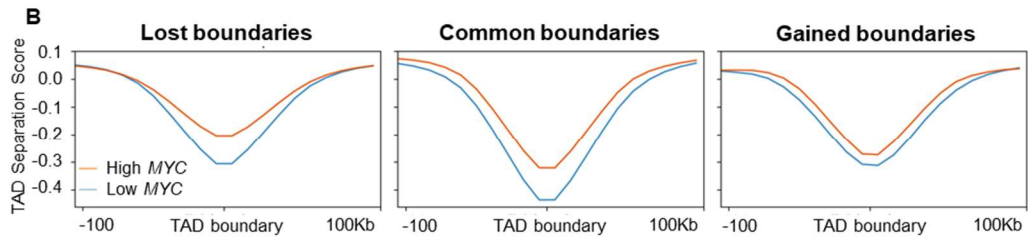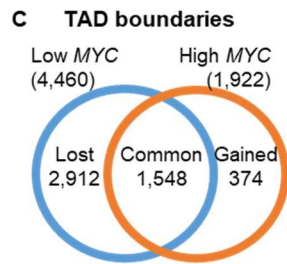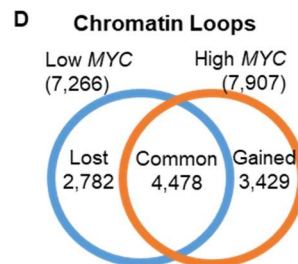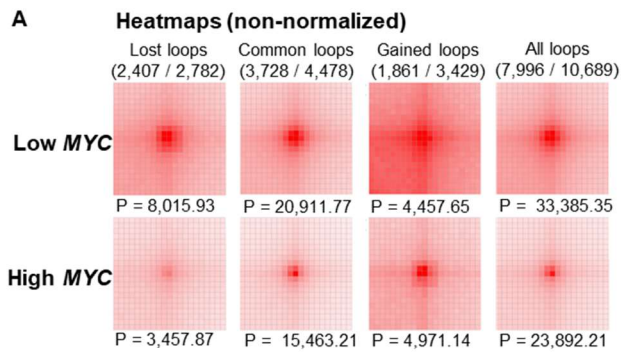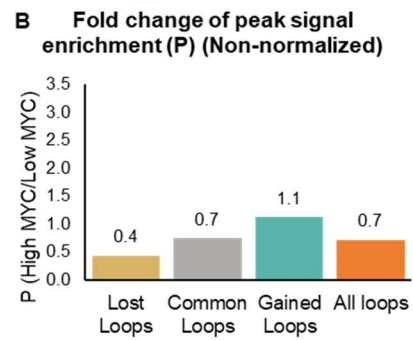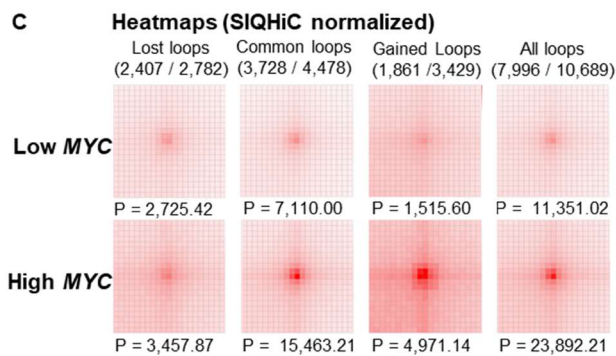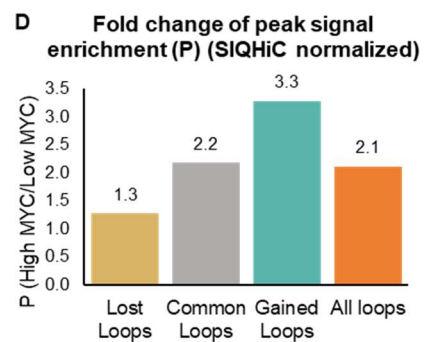

**Supplemental Figure S5 | A/B compartments, topological associated domains and loops**

**identified using SIQHiC.** (A) A/B compartments are not altered after *MYC* overexpression, as shown in a representative view of chromosome 8. Pearson's correlation heatmaps were drawn using first principal component (PC1) at 100kb resolution, shown as tracks above the heatmaps. (B) Topologically associated domain (TAD) separation scores of lost, common and gained TAD boundaries in Low *MYC* and High *MYC* cells. (C) Overlap between TAD boundaries identified in Low *MYC* and High *MYC* cells. (D) Overlap between chromatin loops identified in Low *MYC* and High *MYC* cells.



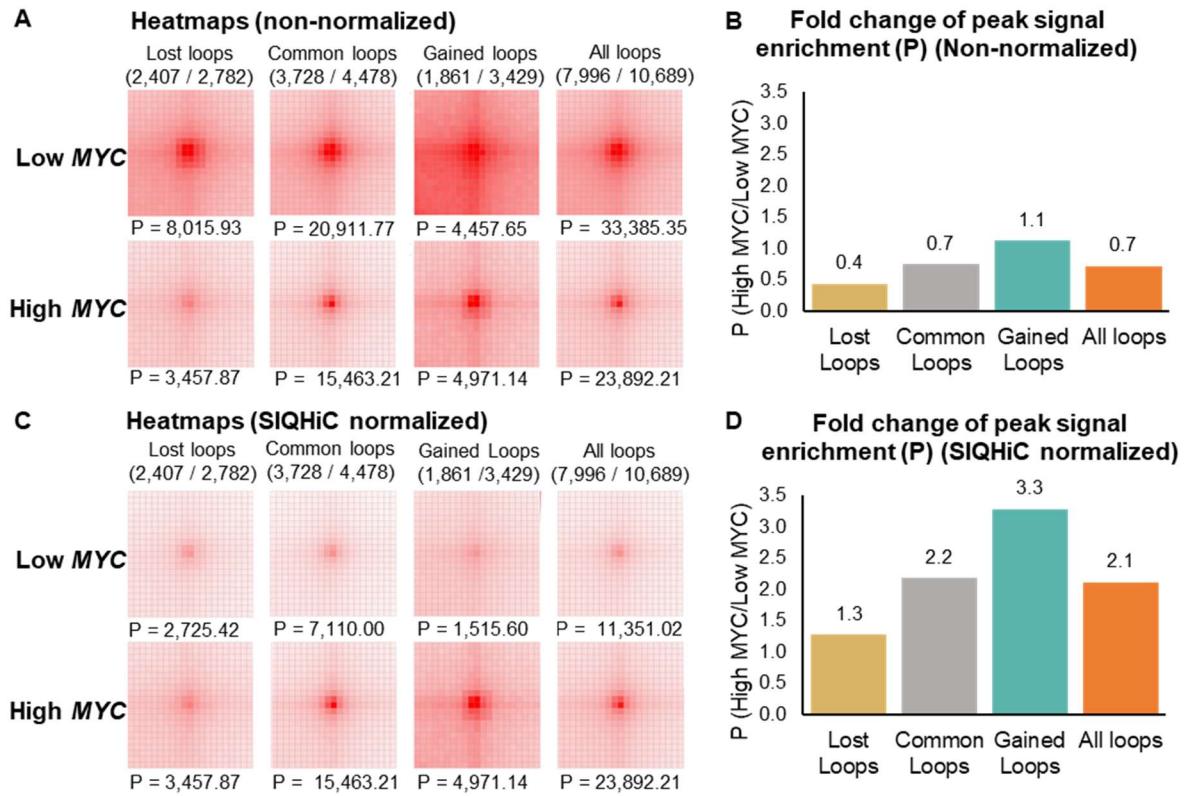

**Supplemental Figure S6 | Aggregate peak analysis (APA).** (A) Aggregate Peak Analysis (APA) plots at 5kb resolution showing the aggregate non-normalized signal of lost, common and gained chromatin loop sets in Low *MYC* and High *MYC* cells. Loop sets were filtered to remove short loops near the diagonal (shown above each APA plot). P: Peak signal at the centre pixel. (B) Fold change of non-normalized peak signal enrichment at lost, common, gained and all chromatin loop sets between High *MYC* and Low *MYC* cells. (C) Same APA analysis as in (A), but with SIQHiC normalization applied. (D) Fold change of SIQHiC normalized peak signal enrichment at lost, common and gained chromatin loop sets between High *MYC* and Low *MYC* cells.

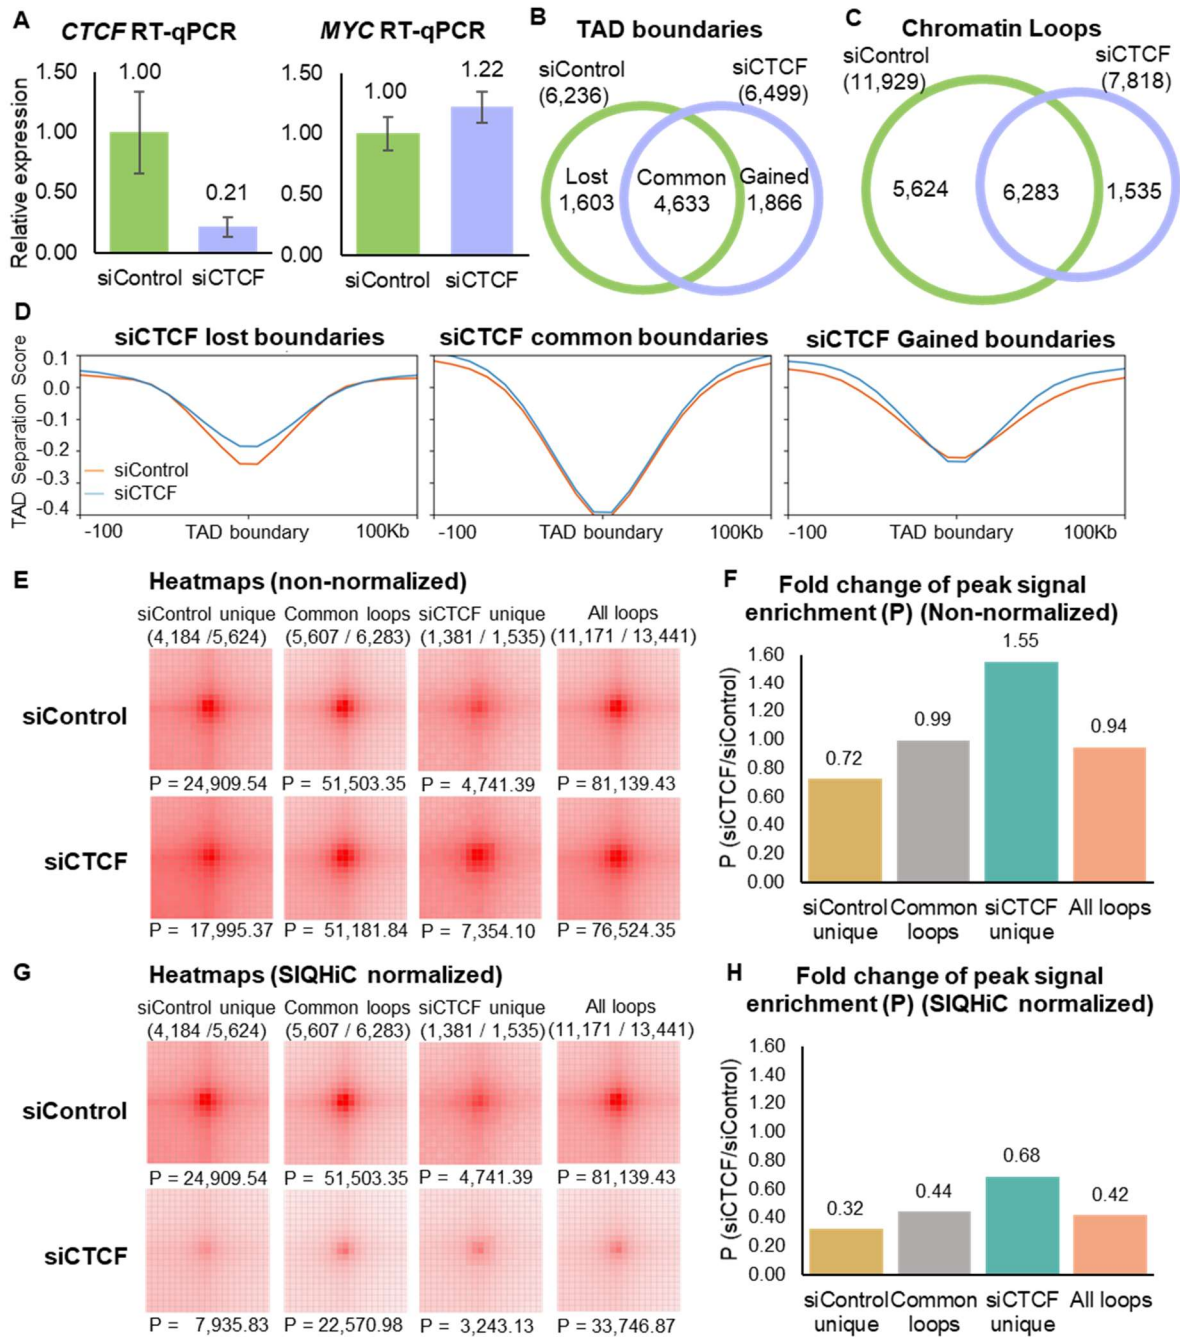

**Supplemental Figure S7 | *CTCF* siRNA knockdown reduced insulation at selected TAD boundaries and reduced chromatin contact frequencies at all chromatin loops.** (A) *CTCF* (left) and *MYC* (right) gene expression in *MYC* overexpressed U2OS cells transfected with control (siControl) and *CTCF* siRNA (siCTCF), normalized against the *TBP* gene. Error bars show standard error across 2 biological replicates. (B) Overlap between TAD boundaries identified in siControl and siCTCF cells. (C) Overlap between chromatin loops identified in siControl and siCTCF cells. (D)

Topologically associated domain (TAD) separation scores of TAD boundaries that were lost, common and gained between siControl and siCTCF cells. **(E)** Aggregate Peak Analysis (APA) plots at 5kb resolution showing the aggregate non-normalized signal of lost, common and gained chromatin loop sets in siControl and siCTCF cells. Loop sets were filtered to remove short loops near the diagonal (shown above each APA plot). P: Peak signal at the centre pixel. **(F)** Fold change of non-normalized peak signal enrichment at lost, common, gained and all chromatin loop sets between siControl and siCTCF cells. **(G)** Same APA analysis as in **(E)**, but with SIQHiC normalization applied. **(H)** Fold change of SIQHiC normalized peak signal enrichment at lost, common and gained chromatin loop sets between siControl and siCTCF cells.

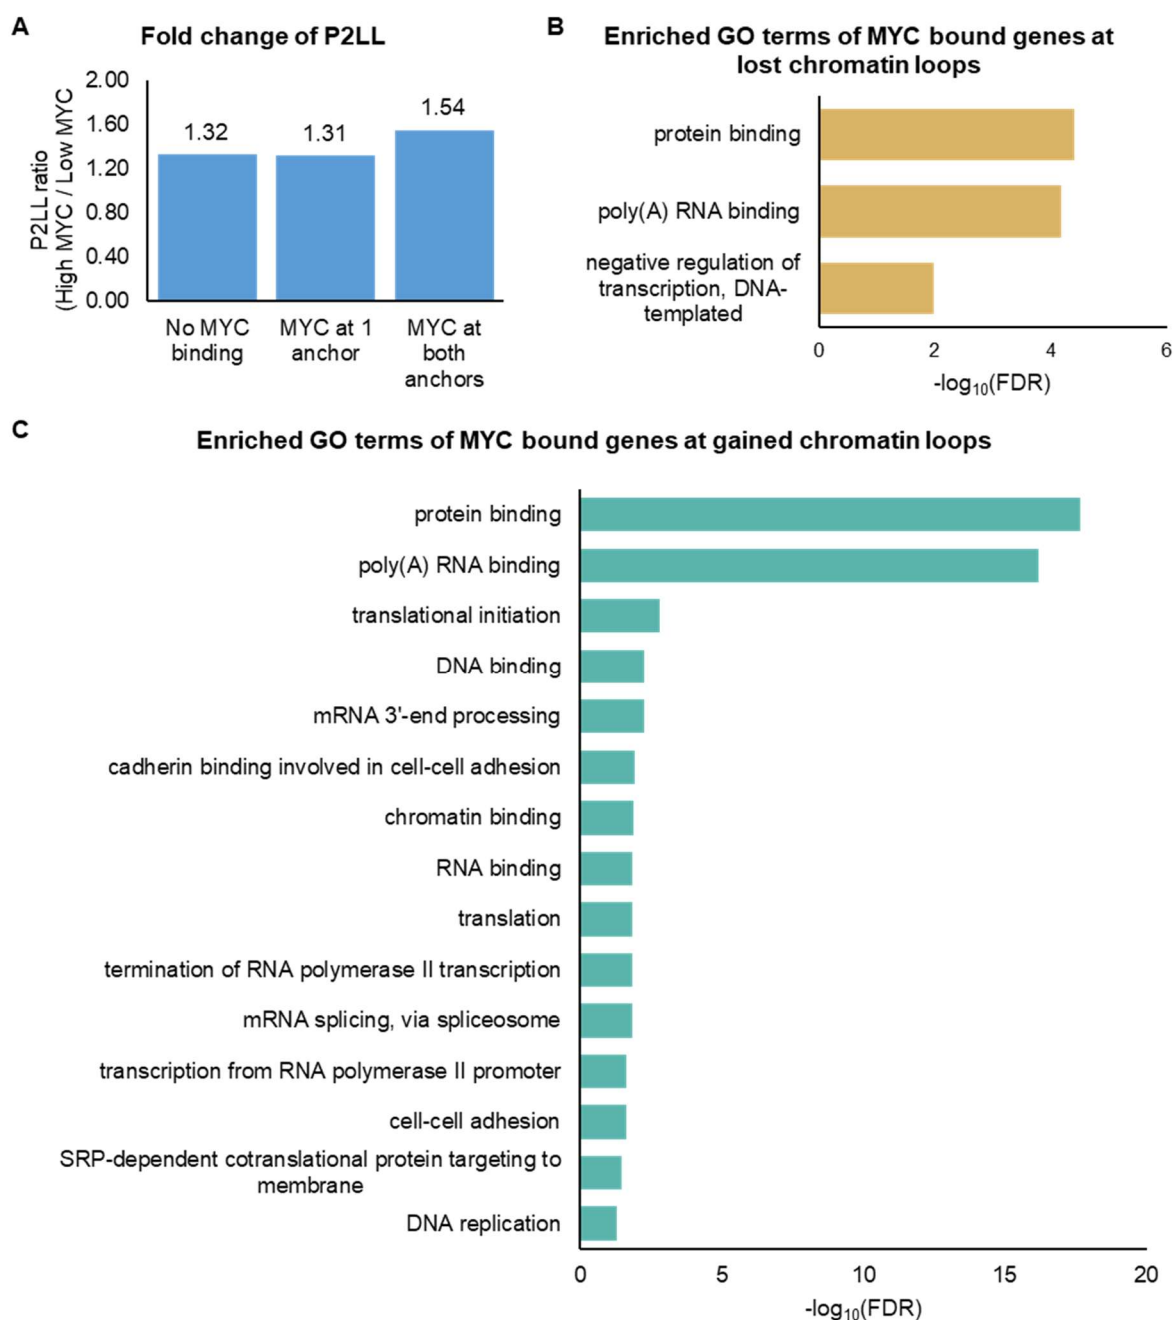

**Supplemental Figure S8 | MYC binding at chromatin loops.** (A) Fold change of P2LL signal between High *MYC* and Low *MYC* cells at chromatin loops with no MYC binding sites, loops with MYC binding sites at 1 loop anchor and loops with MYC at both loop anchors. P: peak enrichment signal. LL: Signal at lower left corner of the APA plot, representing local background signal. P2LL: Ratio of P to LL. (B-C) Gene ontology (GO) terms enriched in MYC bound genes at (B) lost and (C) gained chromatin loops.

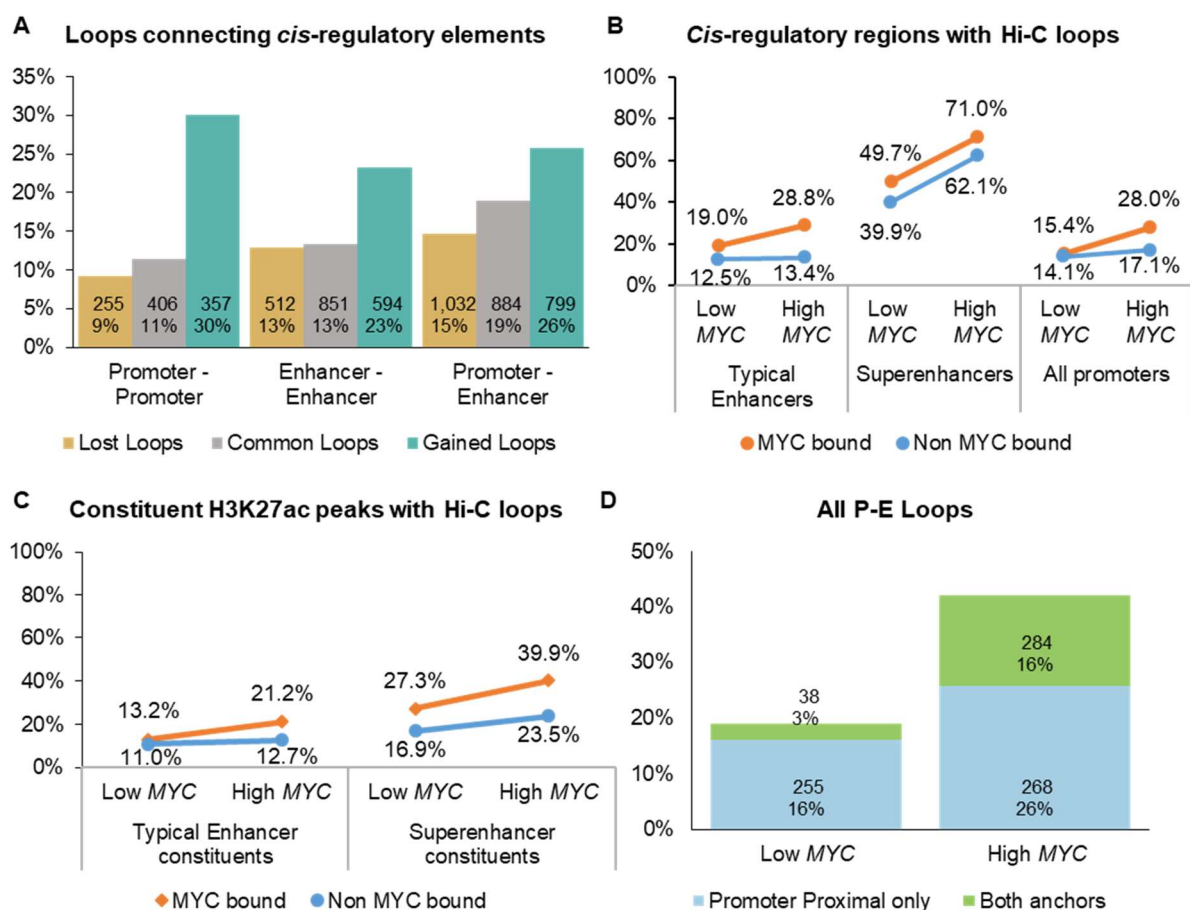

**Supplemental Figure S9 | MYC binding at promoter-enhancer chromatin loops.** (A) Percentage of promoter-promoter, enhancer-enhancer and promoter-enhancer loops within the lost, common and gained chromatin loop sets. (B) Percentage of MYC unbound (blue) and bound (orange) typical enhancers, superenhancers and promoters with Hi-C chromatin loops in Low *MYC* and High *MYC* cells. (C) Percentage of MYC unbound (blue) and bound (orange) typical enhancer and superenhancers H3K27ac constituent peaks. (D) Percentage of all promoter-enhancer chromatin loops bound by MYC at the promoter proximal loop anchor or at both anchors.

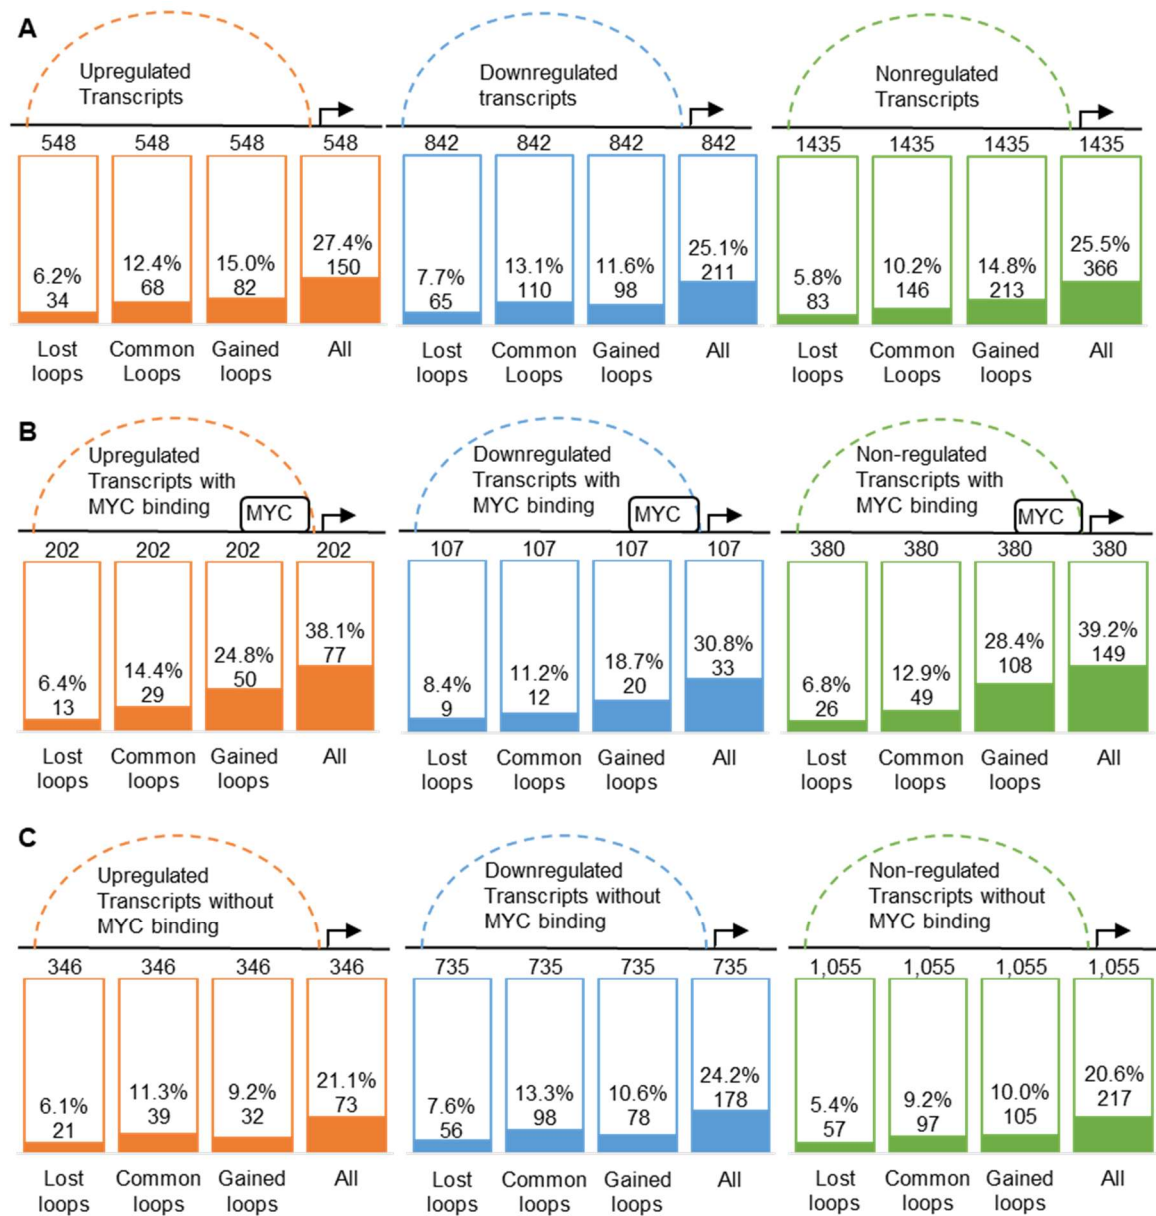

**Supplemental Figure S10 | Correlation between *MYC* regulated transcripts and chromatin**

**loops.** (A-C) Percentage of (A) all, (B) MYC bound and (C) non MYC bound transcripts with Hi-C chromatin loops. Transcripts were stratified into upregulated (orange), downregulated (blue) and non-regulated (green) transcripts.



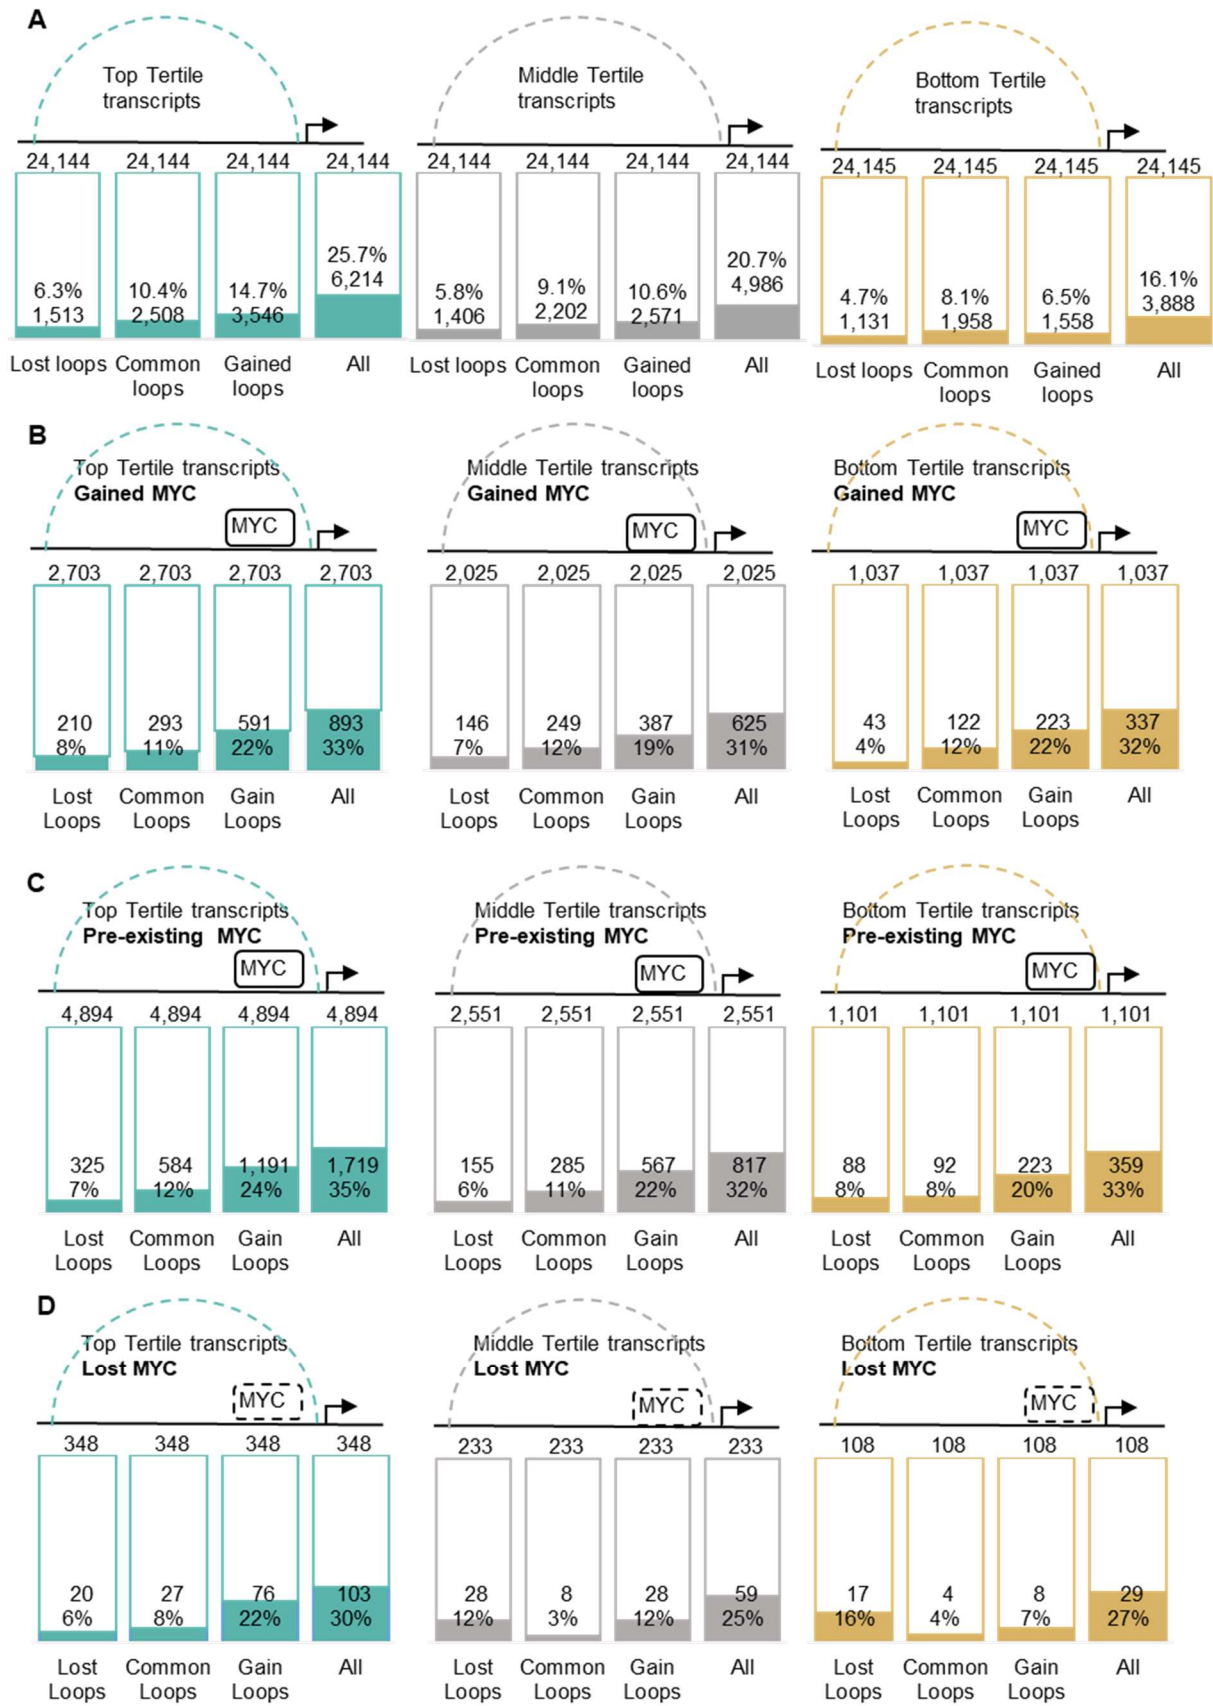

**Supplemental Figure S11 | Correlation between transcript expression and chromatin loops.**

(**A-D**) Percentage of (**A**) all transcripts, (**B**) transcripts with gained MYC binding sites, (**C**) transcripts with pre-existing MYC binding sites and (**D**) transcripts with lost MYC binding sites with Hi-C chromatin loops. Transcripts were stratified into top (teal), middle (grey) and bottom (khaki) tertiles based on transcript expression after *MYC* overexpression.



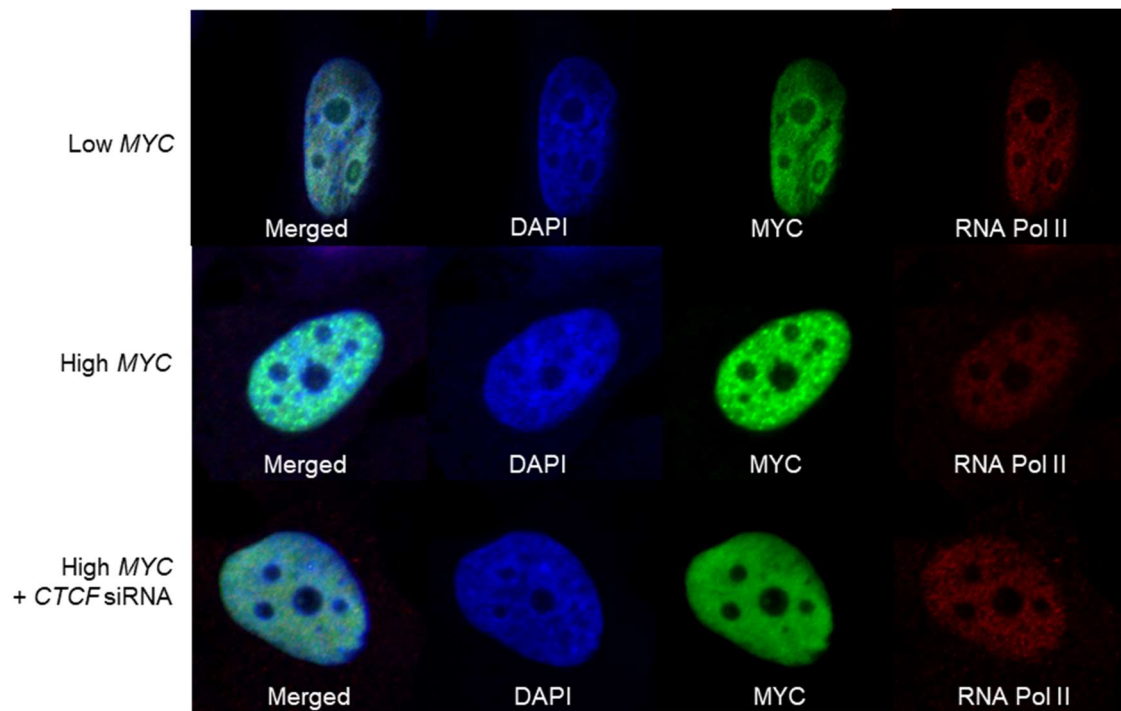

**Supplemental Figure S12 | Immunofluorescence staining of MYC and RNA polymerase II.** From left to right, immunofluorescence images show merged signal, DAPI staining of DNA in blue, MYC staining in green and RNA polymerase II staining in red. RNA Pol II: RNA polymerase II.
